# Supplementary material for: Degradation of phenol by air and polyoxometalate nanofibers using a continuous mode
Source: Royal Society of Chemistry journal article supplement (doi:10.1039/c4ra01434k), 2014-01-01
Supplement: c4ra01434k1.pdf [file c4ra01434k1.pdf]

## Supporting Information for

### Degradation of phenol by air and polyoxometalate nanofibers using a continuous mode

Jian Xu<sup>a</sup>, Siqi Yan<sup>a</sup>, Jianxin Li<sup>a</sup>, Shengtian Wang<sup>a</sup>, Xiaohong Wang<sup>a,\*</sup>, Mingxin Huo<sup>b,\*</sup>

#### Figure legends

**Fig. S1** XRD of  $K_5PMo_{10}V_2O_{40}$ /PAN nanofibers.

**Fig. S2** Evolution of hydroquinone, catechol, p-benzoquinone, obenzoquinone, and maleric acid in the solution during degradation of phenol with  $K_5PMo_{10}V_2O_{40}$ /PAN (0.2 g) in 100mL of 0.72 mM phenol solution with the air flowing rate 0.04 m<sup>3</sup>/h for 120 min under slurry type.

**Fig. S3** (1) Effect of phenol' concentrations on degradation of phenol((Reaction conditions: 100 mL of phenol, 0.2 g of  $K_5PMo_{10}V_2O_{40}$ /PAN, air flowing rate 0.04 m<sup>3</sup>/h, 25°C, and 120 min)  
(2) The influence of temperature on degradation of phenol (Reaction conditions: 100 mL, 0.72 mM of phenol, 0.2 g of  $K_5PMo_{10}V_2O_{40}$ /PAN, air flowing rate 0.04 m<sup>3</sup>/h, and 120 min)  
(3) The amount of  $K_5PMo_{10}V_2O_{40}$ /PAN on degradation of phenol (Reaction conditions: 100 mL, 0.72 mM of phenol, air flowing rate 0.04 m<sup>3</sup>/h, 25°C, and 120 min)

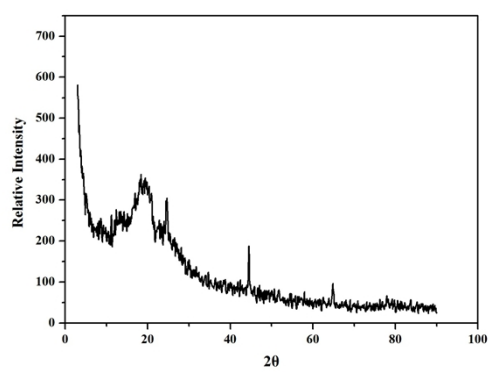

**Fig. S1** XRD of K<sub>5</sub>PMo<sub>10</sub>V<sub>2</sub>O<sub>40</sub>/PAN nanofibers

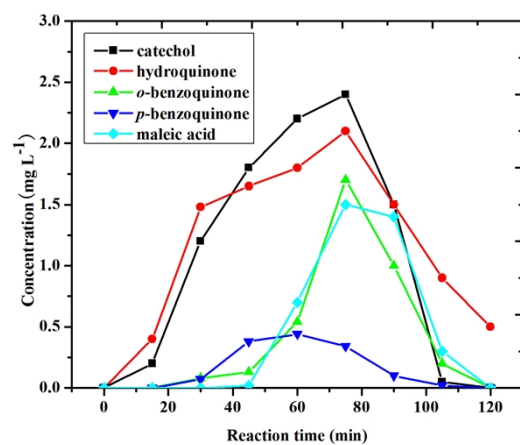

**Fig. S2** Evolution of hydroquinone, catechol, *p*-benzoquinone, *o*-benzoquinone, and maleic acid in the solution during degradation of phenol with  $K_5PMo_{10}V_2O_{40}/PAN$  (0.2 g) in 100mL of 0.72 mM phenol solution with the air flowing rate 0.04 m<sup>3</sup>/h for 120 min under slurry type

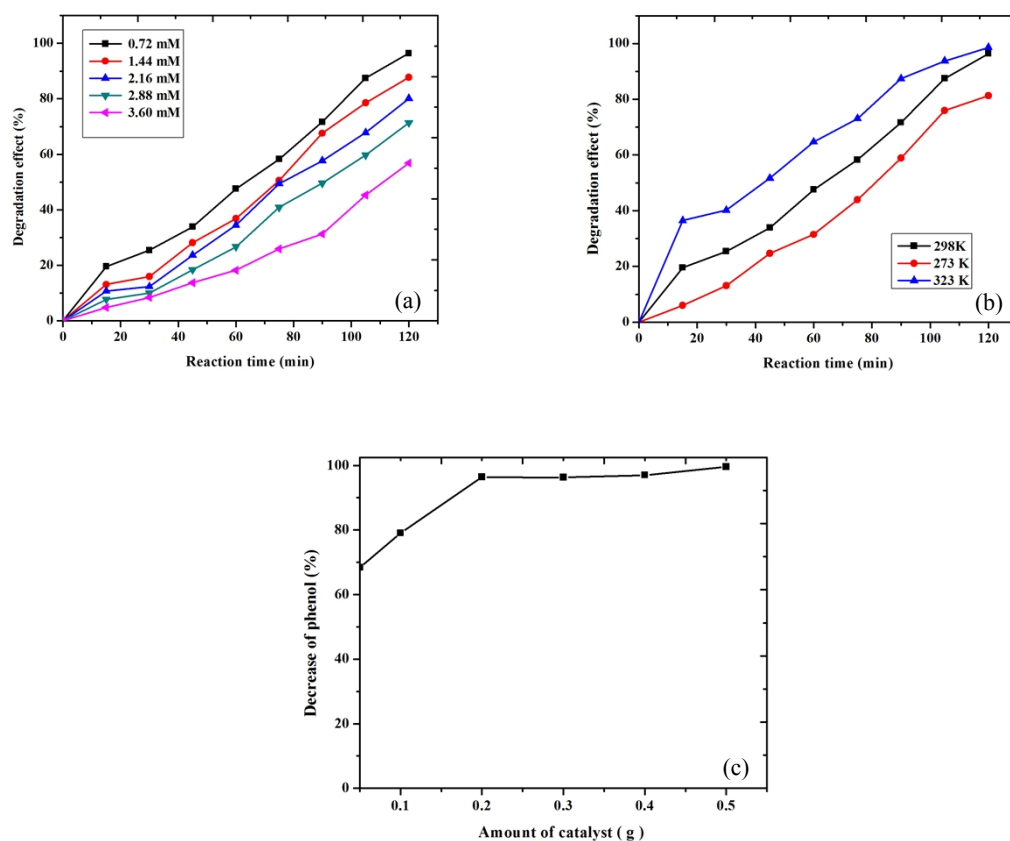

**Fig. S3** (a) Effect of phenol concentrations on degradation of phenol (Reaction conditions: 100 mL of phenol, 0.2 g of  $K_5PMo_{10}V_2O_{40}/PAN$ , air flowing rate  $0.04\text{ m}^3/\text{h}$ ,  $25^\circ\text{C}$ , and 120 min)  
 (b) The influence of temperature on degradation of phenol (Reaction conditions: 100 mL, 0.72 mM of phenol, 0.2 g of  $K_5PMo_{10}V_2O_{40}/PAN$ , air flowing rate  $0.04\text{ m}^3/\text{h}$ , and 120 min)  
 (c) The amount of  $K_5PMo_{10}V_2O_{40}/PAN$  on degradation of phenol (Reaction conditions: 100 mL, 0.72 mM of phenol, air flowing rate  $0.04\text{ m}^3/\text{h}$ ,  $25^\circ\text{C}$ , and 120 min)
